# Supplementary material
Source: publisher figshare collection journal article supplement (https://gsajournals.figshare.com/ndownloader/files/22717451)
Supplement: Supplementary file 1 [file 22717451]

## Sheet: Supplemental table Table_S3_rev
Supplemental Table S4. The average value of features used for the rice model. P-values indicate the statistical significance of the difference between causal genes and genome genes. Fisher's exact test was used for all binary features. Mann-Whitney U Test was used for all continuous variables.
Feature	Feature defination	Causal gene	Genome gene	P-value
is_carbohydrates_metabolism	gene encodes an enzyme involved in carbohydrates metabolism	0.0522088	0.051832	0.886283
is_nucleotides_metabolism	gene encodes an enzyme involved in nucleotides_metabolism	0.0401606	0.0247989	0.145942
is_energy_metabolism	gene encodes an enzyme involved in energy_metabolism	0.00803213	0.0185061	0.337755
is_fatty_acids_lipids_metabolism	gene encodes an enzyme involved in fatty_acids_lipids_metabolism	0.0160643	0.0316875	0.200704
is_specialized_metabolism	gene encodes an enzyme involved in specialized_metabolism	0.188755	0.0429327	2.74e-17
is_cofactors_metabolism	gene encodes an enzyme involved in cofactors_metabolism	0.0200803	0.0243893	0.836719
is_hormones_metabolism	gene encodes an enzyme involved in hormones_metabolism	0.0200803	0.012325	0.241914
is_inorganic_nutrients_metabolism	gene encodes an enzyme involved in inorganic_nutrients_metabolism	0.0481928	0.0191391	0.00363621
is_detoxification_metabolism	gene encodes an enzyme involved in detoxification_metabolism	0	0.0107983	0.119902
is_redox_metabolism	gene encodes an enzyme involved in redox_metabolism	0.00401606	0.0097185	0.737145
is_amino_acids_metabolism	gene encodes an enzyme involved in amino_acids_metabolism	0.064257	0.0183572	2.19e-05
is_other_metabolism	gene encodes an enzyme involved in other_metabolism	0.0200803	0.0128463	0.25926
is_macromolecule_metabolism	gene encodes an enzyme involved in macromolecule_metabolism	0.353414	0.338546	0.637895
is_TF	gene encodes a transcription factor	0.0803213	0.0479223	0.0246109
is_receptor	gene encodes a receptor	0.0160643	0.00547364	0.0509613
is_kinase	gene encodes a protein kinase	0.240964	0.132373	3.55e-06
is_transporter	gene encodes a transporter	0.124498	0.0710083	0.00269549
paralog_copy_number	number of paralogs a gene has	99.4418	36.569	1.25e-24
is_essential_gene	gene is essential or not	0.0441767	0.0896262	0.00977709
network_weight	the weight sum of the gene in the co-function network AraNet or RiceNet	52.0449	76.6594	0.0216528
is_start_gained	gene contains a polymorshism that causes a gain of start codon or not	0.13253	0.117441	0.430367
is_start_lost	gene contains a polymorshism that causes a loss of start codon or not	0.00803213	0.00767054	0.717066
is_stop_gained	gene contains a polymorshism that causes a gain of stop codon or not	0.0843373	0.0538055	0.0466995
is_stop_lost	gene contains a polymorshism that causes a loss of stop codon or not	0.0401606	0.0130325	0.00193655
is_nonsyn_deleterious	gene contains a deterious non-synonymous SNP or not	0.445783	0.285374	9.58e-08
normalized_nonsyn_SNP	the number of non-synonymous SNPs in the gene	0.015082	0.0112685	0.000335136
is_splice_site_SNP	gene contains a SNP in intron splicing site or not	0.0281125	0.0204051	0.363263
TFBS_snp	gene contains a SNP in predicted transcrition factor binding site or not	0.0481928	0.043454	0.640252
TFBS_indel	gene contains an Indel in predicted transcrition factor binding site or not	0.0803213	0.0746947	0.397972
CE_snp	gene contains a SNP in predicted cis-element or not	10.0964	7.78221	0.0382307
CE_indel	gene contains an Indel in predicted cis-element or not	5.1245	4.10057	0.00863204
percent_absence	the percent of natural variant accessions in a species that do not have this gene	0.0857691	0.0752876	0.0263748
